# Supplementary material for: Fe/γ-Al2O3and Fe–K/γ-Al2O3as reverse water-gas shift catalysts
Source: Royal Society of Chemistry journal article supplement (doi:10.1039/c5cy02111a), 2016-01-01
Supplement: c5cy02111a1.pdf [file c5cy02111a1.pdf]

## Supporting Information

### **Fe/ $\gamma$ -Al<sub>2</sub>O<sub>3</sub> and Fe-K/ $\gamma$ -Al<sub>2</sub>O<sub>3</sub> as Reverse Water-Gas Shift Catalysts**

*Jason A. Loiland<sup>1</sup>, Matthew J. Wulfers<sup>1</sup>, Nebojsa S. Marinkovic<sup>2</sup>, and Raul F. Lobo<sup>1,\*</sup>*

<sup>1</sup>Center for Catalytic Science and Technology, Department of Chemical and Biomolecular  
Engineering, University of Delaware, Newark, DE 19716, USA

<sup>2</sup>Department of Chemical Engineering, Columbia University, New York, NY 10027, USA

**Corresponding Author e-mail: [lobo@udel.edu](mailto:lobo@udel.edu)**

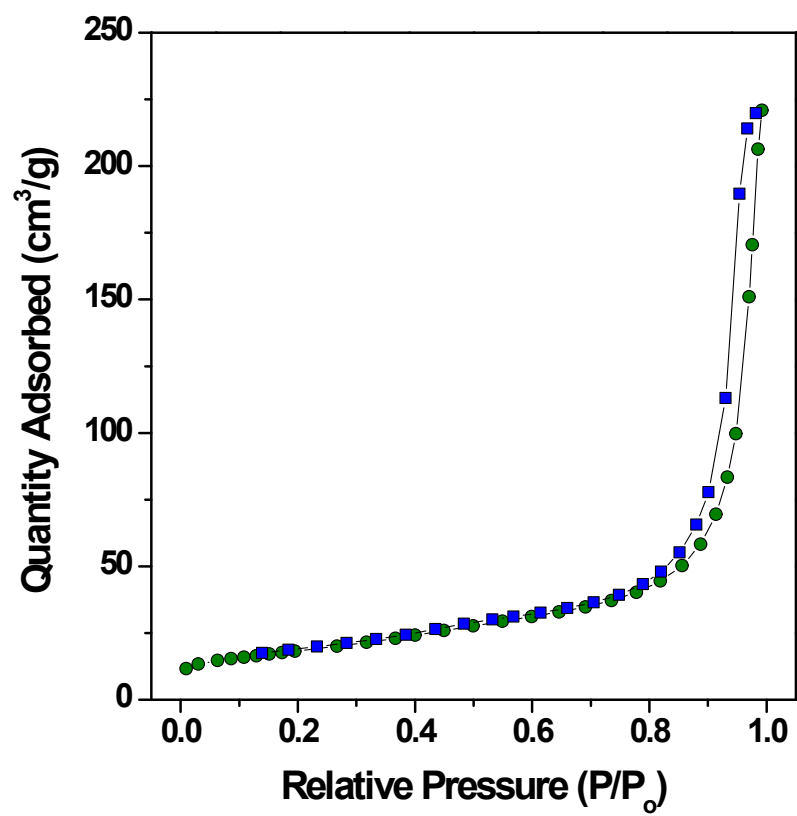

**Figure S1.** N<sub>2</sub> adsorption isotherm for 10% Fe – 2.5% K/Al<sub>2</sub>O<sub>3</sub>.

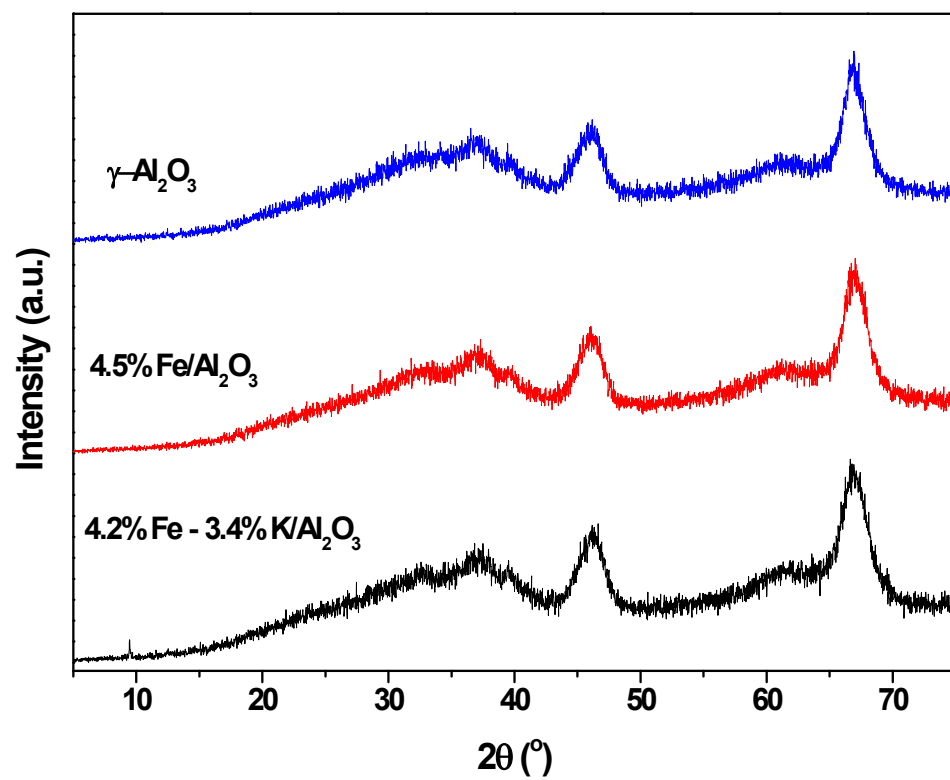

**Figure S2.** Powder XRD patterns of 4.2% Fe – 3.4% K/ $\text{Al}_2\text{O}_3$ , 4.5% Fe/ $\text{Al}_2\text{O}_3$  and  $\gamma\text{-Al}_2\text{O}_3$ .

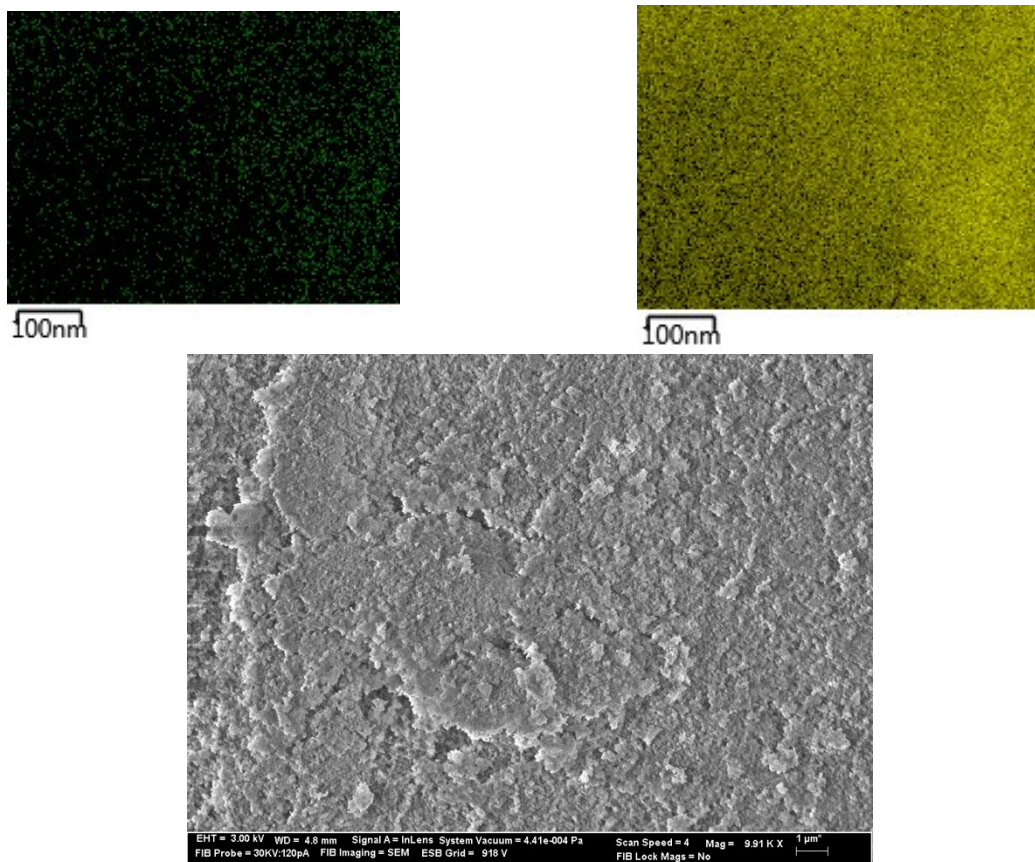

**Figure S3.** Elemental mapping images of 4.5% Fe/Al<sub>2</sub>O<sub>3</sub>. Iron highlighted (green, top left), oxygen highlighted (yellow, top right), and regular SEM image (bottom).

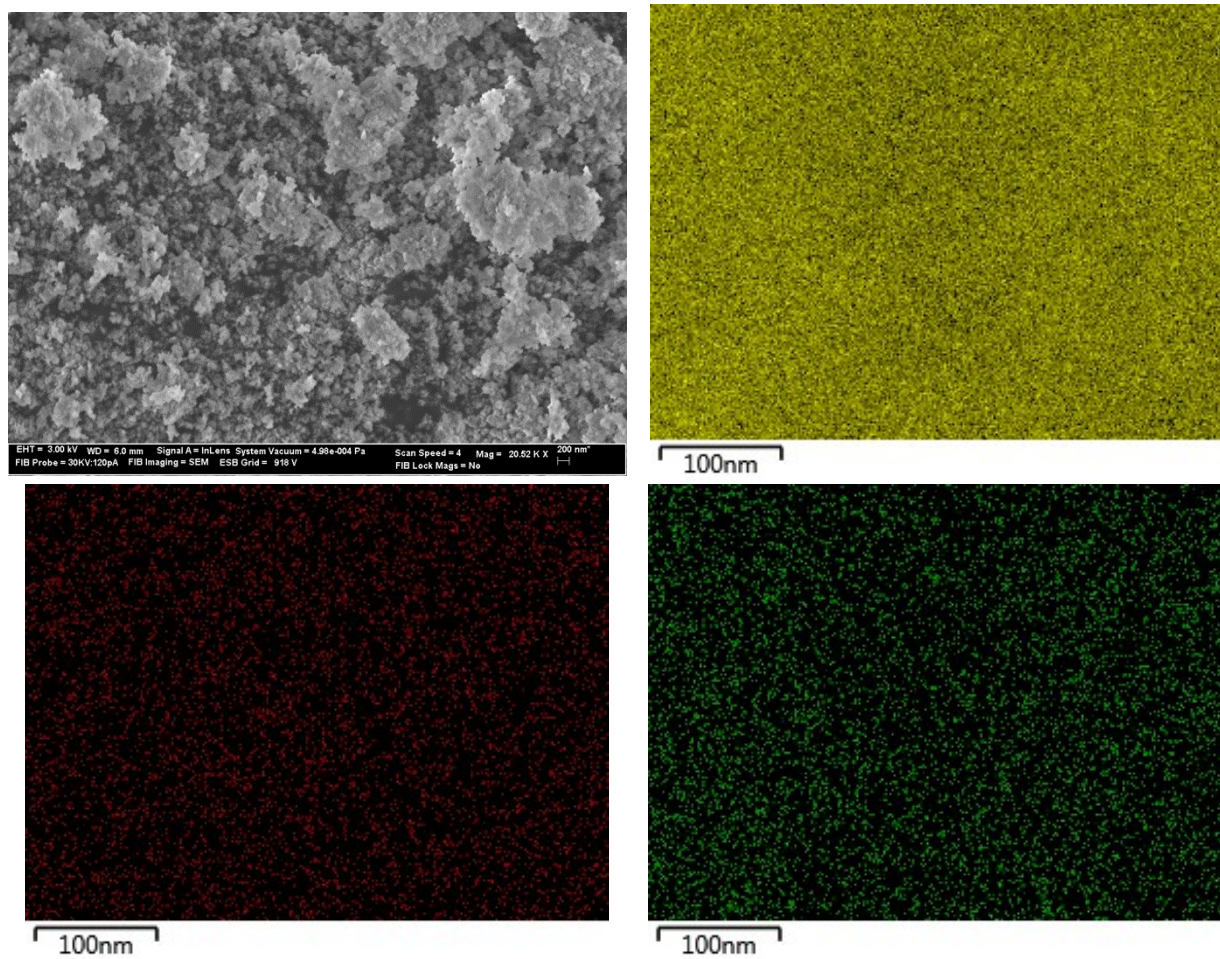

**Figure S4.** Elemental mapping images of 4.2% Fe – 3.4% K/Al<sub>2</sub>O<sub>3</sub>. Regular SEM image (top left), oxygen highlighted (yellow, top right), potassium highlighted (red, bottom right), and iron highlighted (green, bottom right).

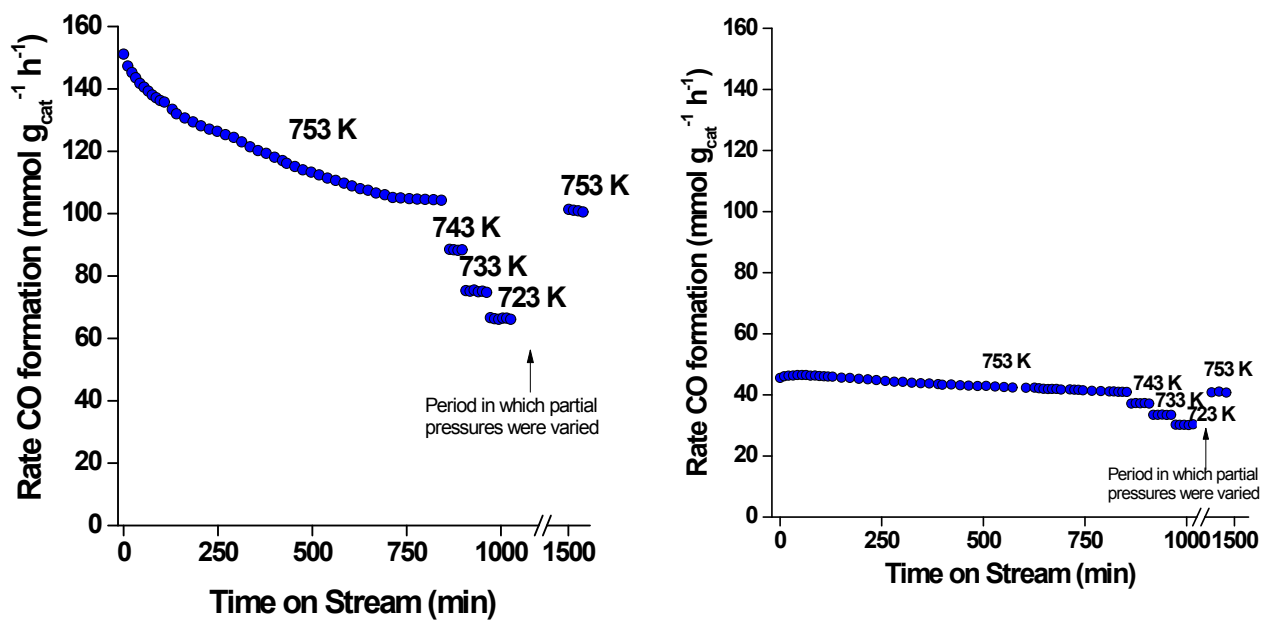

**Figure S5.** CO formation rates on 4.2% Fe -3.4% K/Al<sub>2</sub>O<sub>3</sub> (left) and 4.5% Fe/Al<sub>2</sub>O<sub>3</sub> (right) during experiments in which kinetic parameters were determined with equimolar concentrations of CO<sub>2</sub> and H<sub>2</sub> in the feed. Temperatures are indicated in the figure, and the partial pressures of CO<sub>2</sub> and H<sub>2</sub> were 15 kPa.

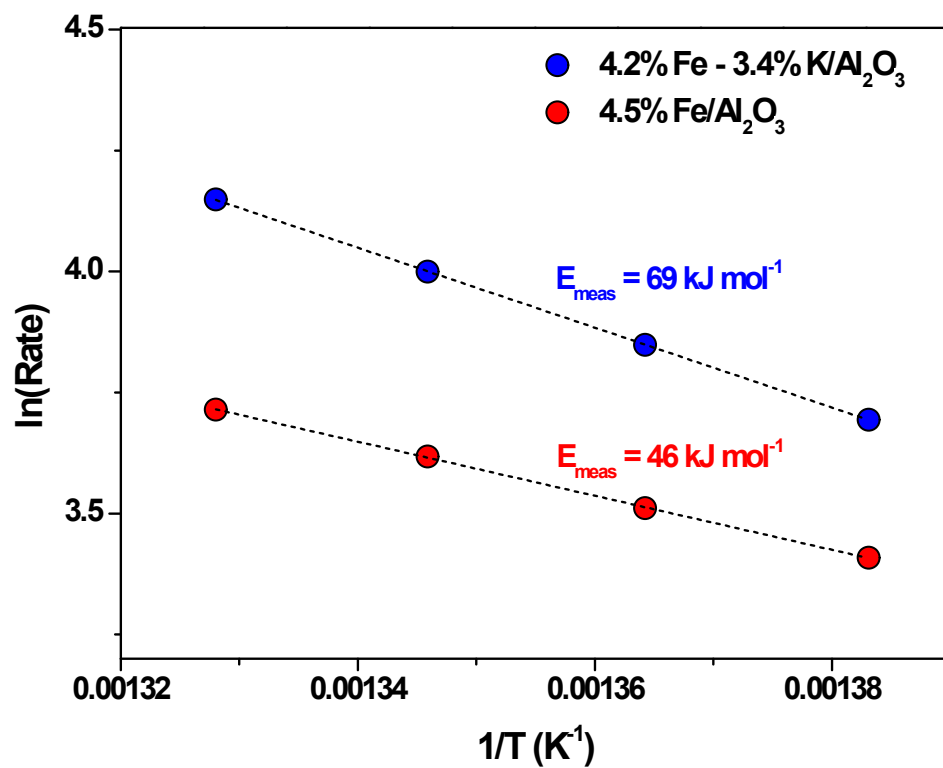

**Figure S6.** Arrhenius plots from conversion of  $\text{CO}_2$  on 4.5% Fe/ $\text{Al}_2\text{O}_3$  and 4.2% Fe - 3.4% K/ $\text{Al}_2\text{O}_3$ . Reaction conditions:  $T = 723\text{-}753 \text{ K}$ ,  $P_{\text{CO}_2} = 15 \text{ kPa}$ ,  $P_{\text{H}_2} = 15 \text{ kPa}$ ,  $F_{\text{tot}} = 75 \text{ sccm}$ .

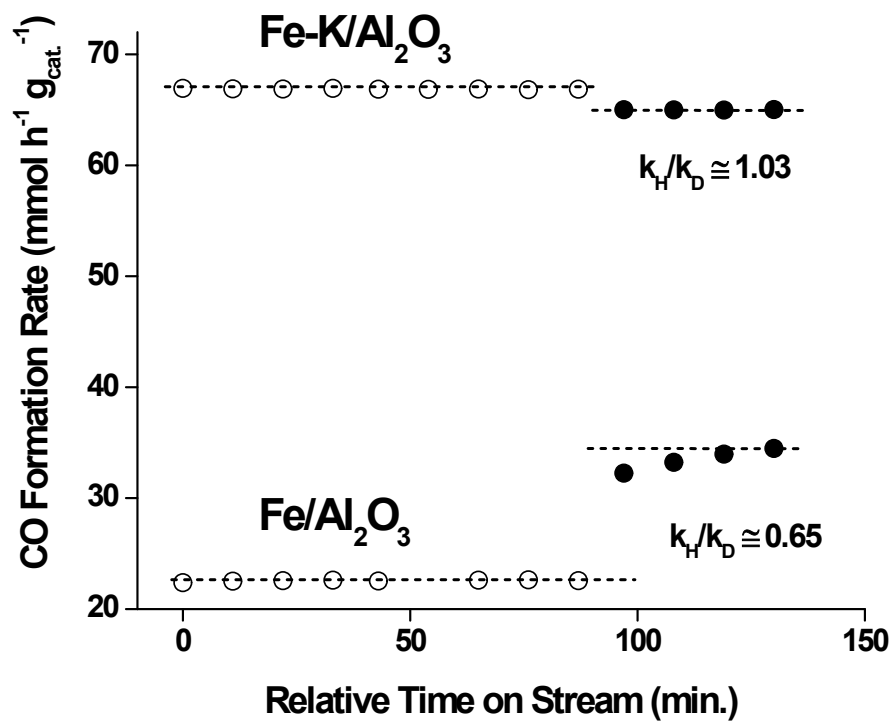

**Figure S7.** CO formation rates on 4.5% Fe/Al<sub>2</sub>O<sub>3</sub> and 4.2% Fe – 3.4% K/Al<sub>2</sub>O<sub>3</sub> while flowing H<sub>2</sub> (open circles) or D<sub>2</sub> (filled circles). Reaction conditions: T = 723 K, P<sub>CO2</sub> = 15 kPa, P<sub>H2</sub> or P<sub>D2</sub> = 15 kPa, F<sub>tot.</sub> = 75 sccm.

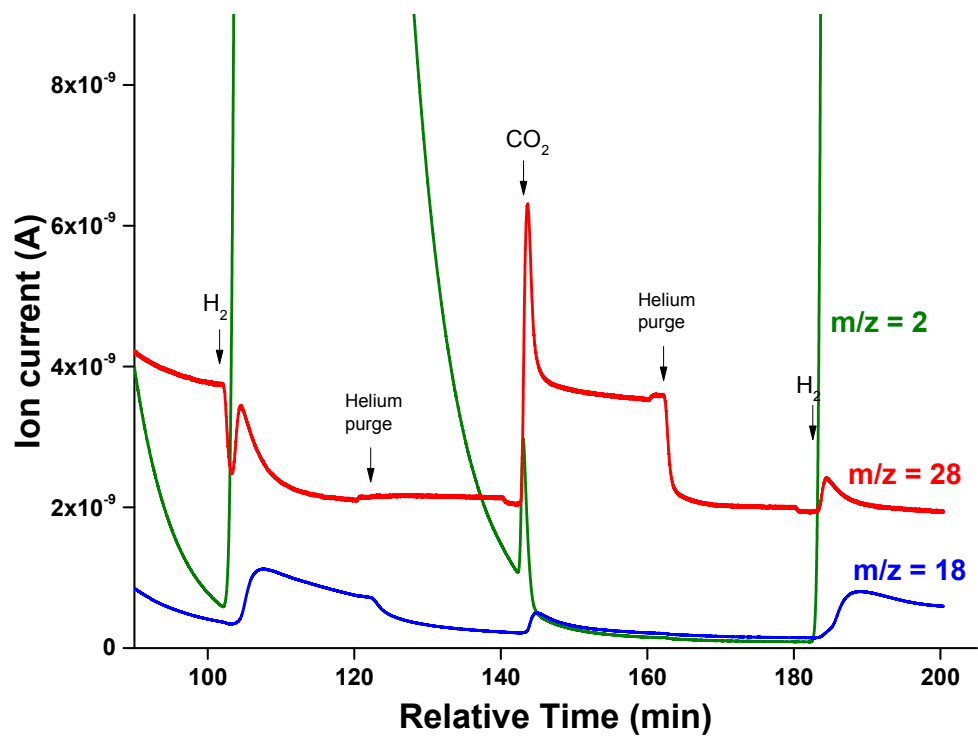

**Figure S8.** Ion currents at  $m/z = 2$  ( $H_2$ ), 18 ( $H_2O$ ), and 28 (CO) during  $H_2/CO_2$  switching experiments on 4.2% Fe – 3.4% K/ $Al_2O_3$ . Arrows with a label indicate a change in gas composition to the indicated gas. Reaction conditions:  $T = 773$  K,  $F_{He} = 36$  sccm,  $F_{H_2}$  or  $F_{CO_2} = 4$  sccm. The figure is a modification of Figure 2.

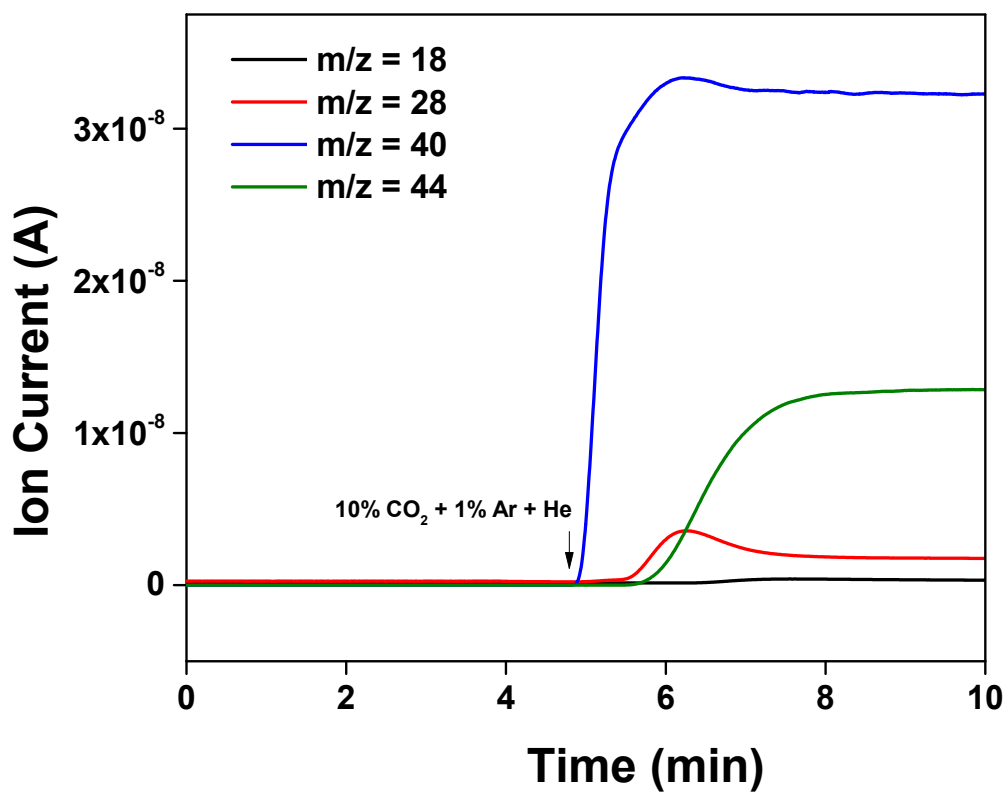

**Figure S9.** Transient response curves for Ar ( $m/z = 40$ ),  $\text{CO}_2$  ( $m/z = 28, 44$ ), CO ( $m/z = 28$ ), and  $\text{H}_2\text{O}$  ( $m/z = 18$ ) during gas switching experiments over Fe-K/ $\text{Al}_2\text{O}_3$ . Gas flow was switched from 10%  $\text{H}_2/\text{He}$  to 10%  $\text{CO}_2/1\% \text{ Ar}/\text{He}$ . Reaction conditions:  $T = 773 \text{ K}$ , total flow rate = 40 sccm.

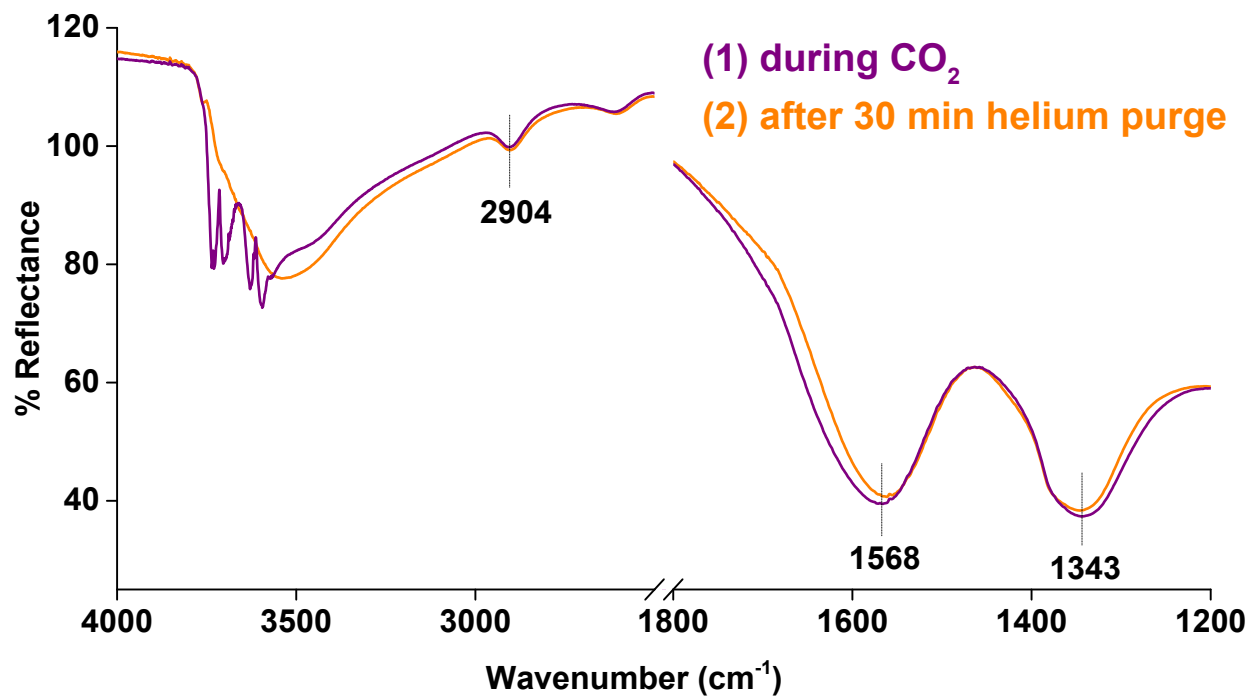

**Figure S10.** Diffuse reflectance IR spectra collected *in situ* of 7.7% Fe – 3.4% K/Al<sub>2</sub>O<sub>3</sub> after 30 min of CO<sub>2</sub> flow (purple) and after purging the chamber for 30 min with helium. The temperature was 723 K.

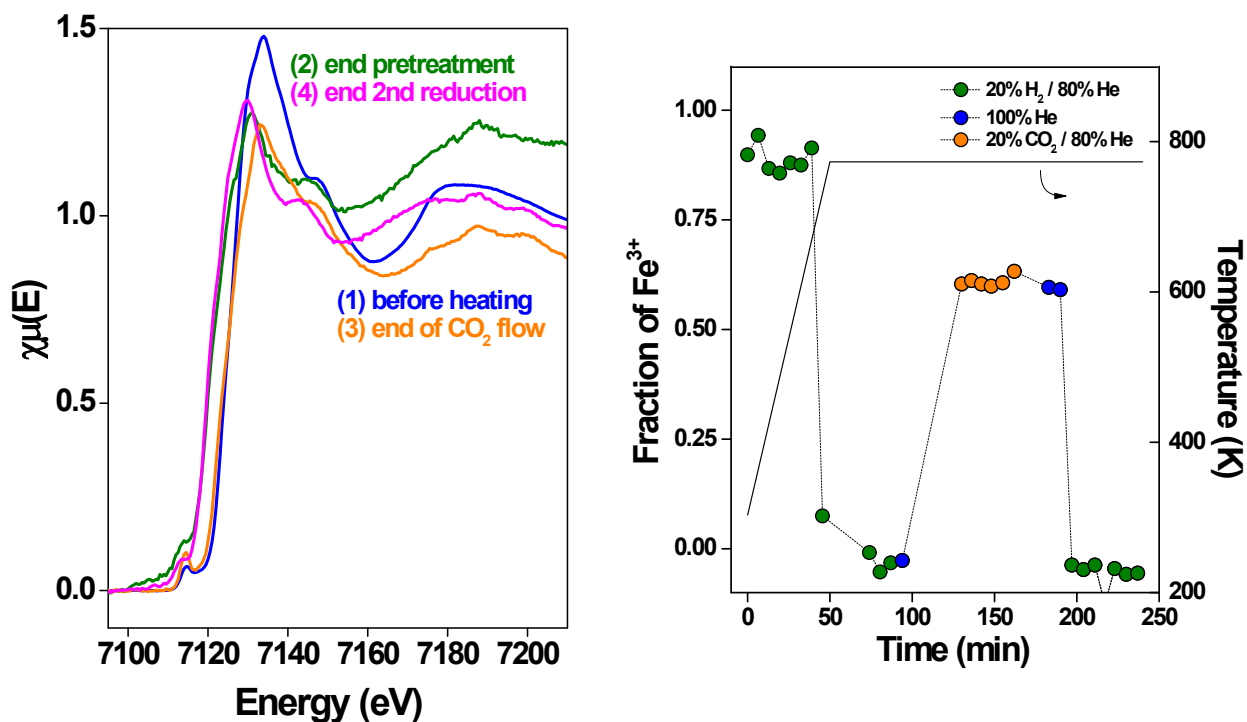

**Figure S11.** XANES spectra collected *in-situ* (left) during a gas switching experiment on 4.5% Fe/Al<sub>2</sub>O<sub>3</sub> and fraction of Fe<sup>3+</sup> (right) over the duration of the experiment. The catalyst was pretreated in H<sub>2</sub>, and the H<sub>2</sub> flow was then stopped while CO<sub>2</sub> was added simultaneously. The catalyst was then re-reduced in H<sub>2</sub> after the period in CO<sub>2</sub>. T<sub>rxn</sub> = 773 K, P<sub>CO<sub>2</sub></sub> or P<sub>H<sub>2</sub></sub> = 20 kPa, F<sub>tot</sub> = 10 sccm.

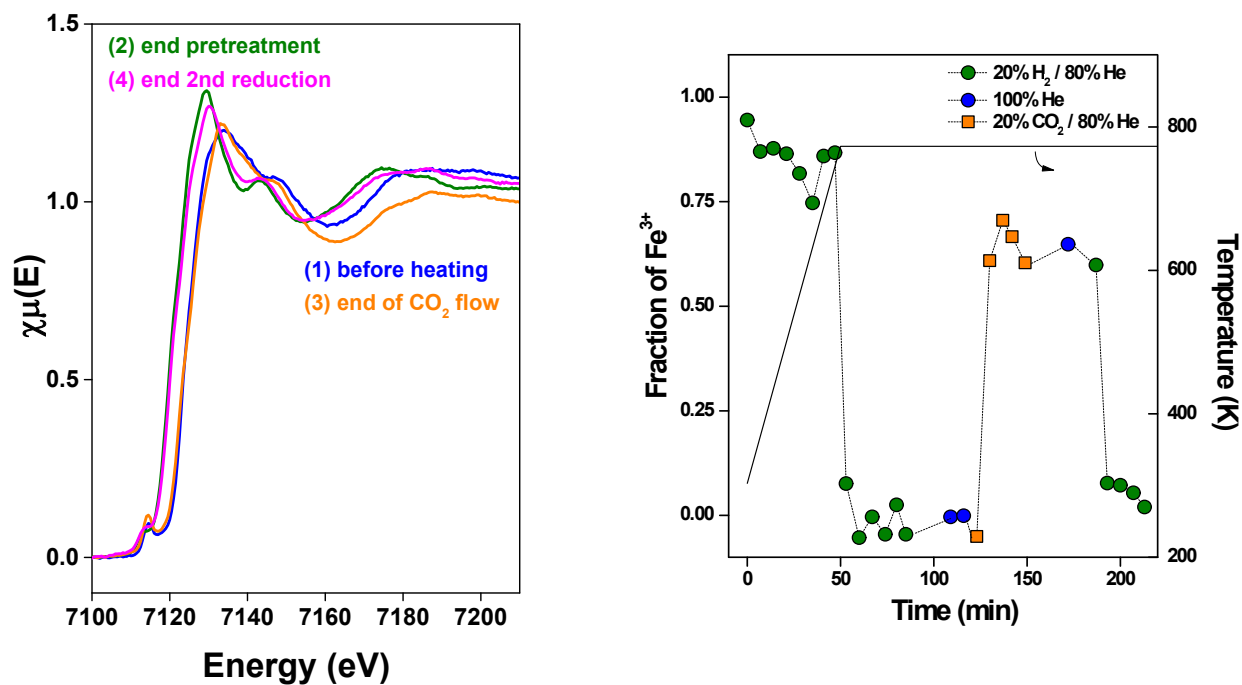

**Figure S12.** XANES spectra collected *in situ* (left) during a gas switching experiment on 4.2% Fe – 3.4% K/Al<sub>2</sub>O<sub>3</sub> and fraction of Fe<sup>3+</sup> (right) over the duration of the experiment. The catalyst was pretreated in H<sub>2</sub>, and the H<sub>2</sub> flow was then stopped while CO<sub>2</sub> was added simultaneously. The catalyst was then re-reduced in H<sub>2</sub> after the period in CO<sub>2</sub>. Reaction conditions: T<sub>rxn</sub> = 773 K, P<sub>CO2</sub> or P<sub>H2</sub> = 20 kPa, F<sub>tot</sub> = 10 sccm.

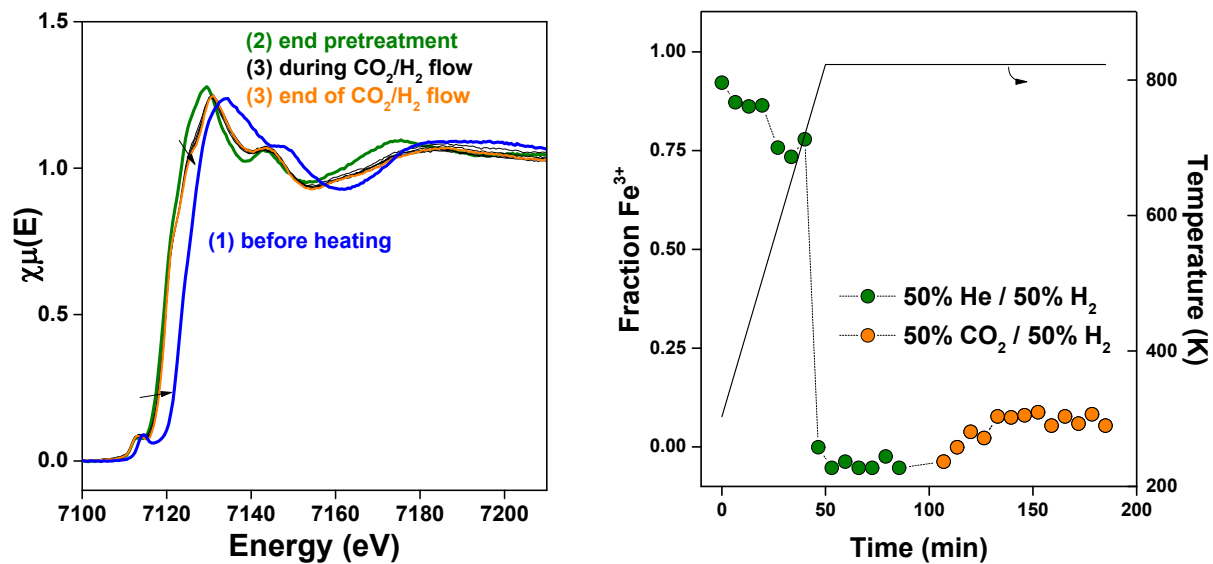

**Figure S13.** XANES spectra collected *in situ* before and during flow of  $\text{CO}_2/\text{H}_2$  on 4.2% Fe – 3.4% K/ $\text{Al}_2\text{O}_3$  (left) and fraction of  $\text{Fe}^{3+}$  determined from XANES spectra over the duration of the experiment (right).  $T_{\text{rxn}} = 823 \text{ K}$ ,  $F_{\text{tot}} = 10 \text{ sccm}$ .

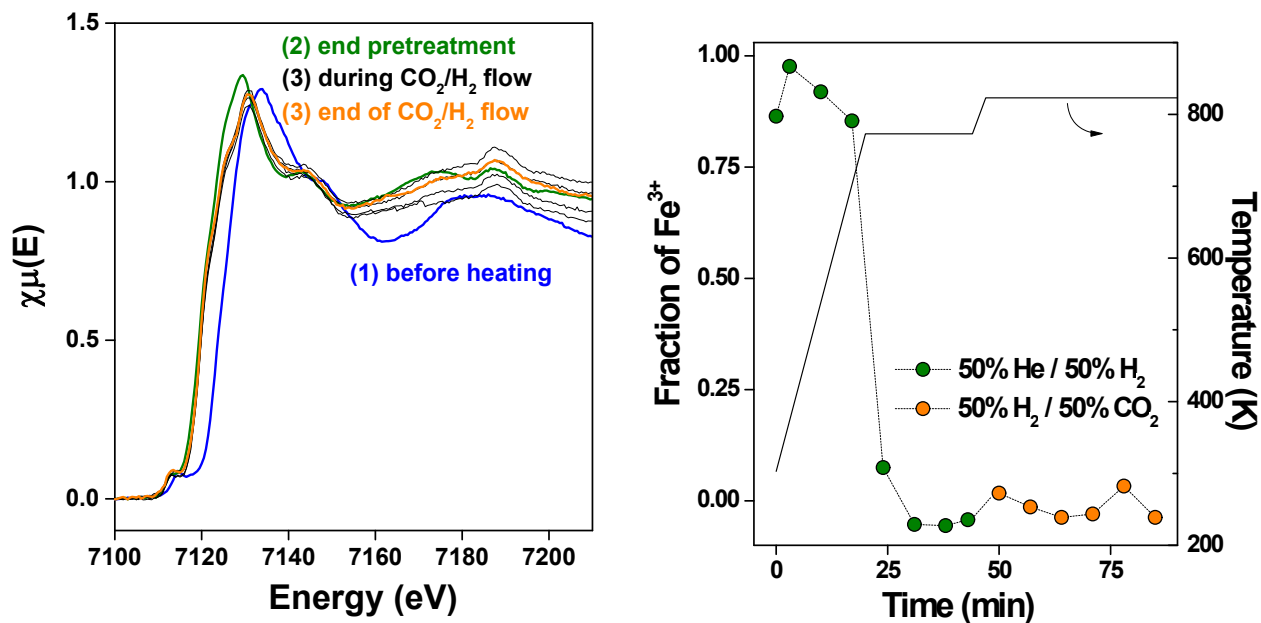

**Figure S14.** XANES spectra collected *in situ* before and during flow of  $\text{CO}_2/\text{H}_2$  on 4.5% Fe/ $\text{Al}_2\text{O}_3$  (left) and fraction of  $\text{Fe}^{3+}$  determined from XANES spectra over the duration of the experiment (right).  $T_{\text{rxn}} = 823 \text{ K}$ ,  $F_{\text{tot}} = 10 \text{ sccm}$ .

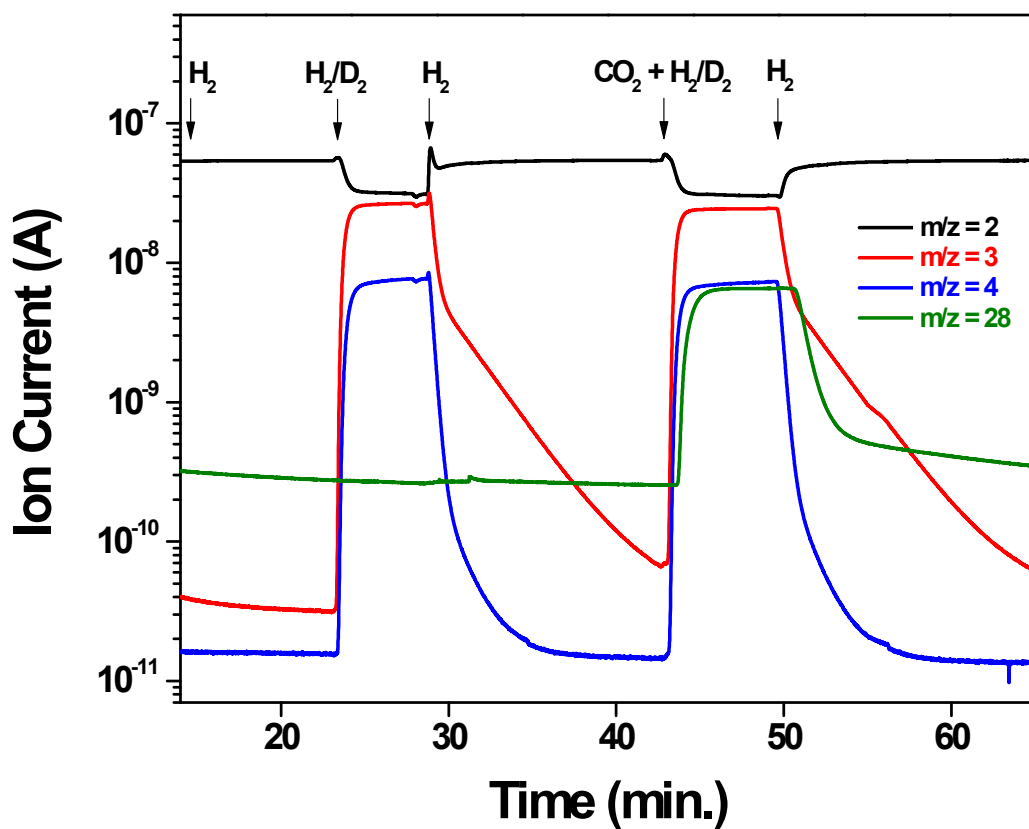

**Figure S15.** Ion currents at  $m/z = 2$  ( $\text{H}_2$ ), 3 (HD), 4 ( $\text{D}_2$ ), and 28 (CO) during flow of 7.5 kPa  $\text{H}_2$ , 7.5 kPa  $\text{H}_2 + 7.5$  kPa  $\text{D}_2$ , and 7.5 kPa  $\text{H}_2 + 7.5$  kPa  $\text{D}_2 + 15$  kPa  $\text{CO}_2$  on  $\text{Fe}/\text{Al}_2\text{O}_3$ . Arrows with a label indicate a change in gas composition to the indicated gas. Reaction conditions:  $T = 753$  K,  $F_{\text{tot}} = 75$  sccm.

**Table S1.** Catalyst precursor amounts, nominal weight loadings, and actual weight loadings.

| Catalyst      | Mass Fe<br>Precursor / g | Mass K<br>Precursor / g | Mass Al <sub>2</sub> O <sub>3</sub><br>/ g | Nominal<br>Fe<br>Loading /<br>wt % | Nominal<br>K<br>Loading /<br>wt % | Actual Fe<br>Loading /<br>wt % | Actual K<br>Loading /<br>wt % |
|---------------|--------------------------|-------------------------|--------------------------------------------|------------------------------------|-----------------------------------|--------------------------------|-------------------------------|
| <b>1Fe 3K</b> | 0.22                     | 0.19                    | 2.75                                       | 1.05                               | 3.7                               | 0.9                            | 3.5                           |
| <b>4Fe</b>    | 0.994                    | --                      | 2.75                                       | 4.8                                | --                                | 4.5                            | -                             |
| <b>10Fe</b>   | 1.99                     | --                      | 2.75                                       | 9.1                                | --                                | 9.1                            | -                             |
| <b>8Fe 3K</b> | 1.99                     | 0.243                   | 2.75                                       | 8.7                                | 4.3                               | 7.7                            | 3.4                           |
| <b>5Fe 1K</b> | 1.50                     | 0.10                    | 2.75                                       | 6.9                                | 1.9                               | 6.7                            | 2.3                           |
| <b>4Fe 4K</b> | 0.994                    | 0.243                   | 2.75                                       | 4.5                                | 4.6                               | 4.2                            | 3.4                           |
